# Supplementary material for: Bacterial Pathogens in the Food Industry: Antibiotic Resistance and Virulence Factors of Salmonella enterica Strains Isolated from Food Chain Links
Source: MDPI journal article supplement (doi:10.3390/pathogens11111323), 2022-11-10
Supplement: s1 [file s1]

**Table S1.** The PCR conditions for amplification of virulence markers, AMR-related and  $\beta$ -lactamases-related genes in *Salmonella* strains.

| Target Gene      | Primer Sequences 5'-3'                                    | PCR conditions                                                                                                                                                                                                                   | Product Size |
|------------------|-----------------------------------------------------------|----------------------------------------------------------------------------------------------------------------------------------------------------------------------------------------------------------------------------------|--------------|
| <i>invA</i>      | F-GTGAAATTATCGCCACGTTCTGGGCAA<br>R-TCATCGCACCGTCAAAGGAACC | initial denaturation step of 5 min at 94 °C, followed by 35 cycles as follows:<br>30 sec at 94 °C for denaturation, 30 sec at 63 °C for annealing, 30 sec at 72°C<br>for extension and a final extension step of 10 min at 72 °C | 284 bp       |
| <i>fimA</i>      | F-CCTTTCTCCATCGTCCTGAA<br>R-TGGTGTTATCTGCCTGACCA          | initial denaturation step of 5 min at 94 °C, followed by 35 cycles as follows:<br>30 sec at 94 °C for denaturation, 30 sec at 56 °C for annealing, 30 sec at 72°C<br>for extension and a final extension step of 10 min at 72 °C | 85 bp        |
| <i>stn</i>       | F-CTTTGGTCGTAAAATAAGGCG<br>R-TGCCCAAAGCAGAGAGATTC         | initial denaturation step of 5 min at 94 °C, followed by 35 cycles as follows:<br>30 sec at 94 °C for denaturation, 30 sec at 56 °C for annealing, 30 sec at 72°C<br>for extension and a final extension step of 10 min at 72 °C | 260 bp       |
| <i>spvC</i>      | F-ACTCCTTGCACAACCAAATGCGGA<br>R-TGTCTTCTGCATTCGCCACCATCA  | initial denaturation step of 5 min at 94 °C, followed by 35 cycles as follows:<br>30 sec at 94 °C for denaturation, 30 sec at 63 °C for annealing, 30 sec at 72°C<br>for extension and a final extension step of 10 min at 72 °C | 571 bp       |
| <i>spvR</i>      | F-CAGGTTCTTCAGTATCGCA<br>R-TTTGGCCGGAAATGGTCAGT           | initial denaturation step of 5 min at 94 °C, followed by 35 cycles as follows:<br>30 sec at 94 °C for denaturation, 30 sec at 56 °C for annealing, 30 sec at 72°C<br>for extension and a final extension step of 10 min at 72 °C | 310 bp       |
| <i>rck</i>       | F-CTGACCACCCATTCCGTGT<br>R-GTAACCGACACCAACGTT             | initial denaturation step of 5 min at 94 °C, followed by 35 cycles as follows:<br>30 sec at 94 °C for denaturation, 30 sec at 56 °C for annealing, 30 sec at 72°C<br>for extension and a final extension step of 10 min at 72 °C | 479 bp       |
| <i>strA/strB</i> | F-ATGGTGGACCCTAAAACCTCT<br>R-CGTCTAGGATCGAGACAAAG         | initial denaturation step of 10 min at 94 °C, followed by 30 cycles as follows:<br>30 sec at 94 °C for denaturation, 1 min at 63 °C for annealing, 30 sec at 72°C<br>for extension and a final extension step of 10 min at 72 °C | 891 bp       |
| <i>aadA</i>      | F-GTGGATGGCGGCCTGAAGCC<br>R-AATGCCCAGTCGGCAGCG            | initial denaturation step of 10 min at 94 °C, followed by 30 cycles as follows:<br>30 sec at 94 °C for denaturation, 1 min at 63 °C for annealing, 30 sec at 72°C<br>for extension and a final extension step of 10 min at 72 °C | 525 bp       |
| <i>aadB</i>      | F-GAGGAGTTGGAATATGGATT<br>R-CTTCATCGGCATAGTAAAAG          | initial denaturation step of 7 min at 95 °C, followed by 35 cycles as follows:<br>30 sec at 94 °C for denaturation, 30 sec at 60 °C for annealing, 45 sec at 72°C<br>for extension and a final extension step of 10 min at 72 °C | 208 bp       |
| <i>aacC</i>      | F-GGCGCGATCAACGAATTTATCCGA<br>R-CCATTGATGCCGAAGGAAACGAT   | initial denaturation step of 5 min at 95 °C, followed by 30 cycles as follows:<br>1 min at 95 °C for denaturation, 1 min at 58 °C for annealing, 1 min at 72°C<br>for extension and a final extension step of 7 min at 72 °C     | 448 bp       |
| <i>floF</i>      | F-CACGTTGAGCCTCTATATGG<br>R-ATGCAGAAGTAGAACGCGAC          | initial denaturation step of 10 min at 94 °C, followed by 30 cycles as follows:<br>1 min at 94 °C for denaturation, 1 min at 61 °C for annealing, 1 min at 72°C<br>for extension and a final extension step of 10 min at 72 °C   | 888 bp       |

Table S1. Cont.

| Target Gene      | Primer Sequences 5'-3'                                  | PCR conditions                                                                                                                                                                                                                   | Product Size |
|------------------|---------------------------------------------------------|----------------------------------------------------------------------------------------------------------------------------------------------------------------------------------------------------------------------------------|--------------|
| <i>floR</i>      | F-AACCCGCCCTCTGGATCAAGTCAA<br>R-CAAATCACGGGCCACGCTGTATC | initial denaturation step of 10 min at 94 °C, followed by 30 cycles as follows:<br>1 min at 94 °C for denaturation, 1 min at 60 °C for annealing, 3 min at 72°C<br>for extension and a final extension step of 10 min at 72 °C   | 548 bp       |
| <i>cat1</i>      | F-CCTATAACCAGACCGTTCAG<br>R-TCACAGACGGCATGATGAAC        | initial denaturation step of 5 min at 94 °C, followed by 30 cycles as follows:<br>1 min at 94 °C for denaturation, 1 min at 56 °C for annealing, 1 min at 72°C<br>for extension and a final extension step of 10 min at 72 °C    | 491 bp       |
| <i>cat2</i>      | F-CCGGATTGACCTGAATACCT<br>R-TCACATACTGCATGATGAAC        | initial denaturation step of 5 min at 94 °C, followed by 30 cycles as follows:<br>1 min at 94 °C for denaturation, 1 min at 56 °C for annealing, 1 min at 72°C<br>for extension and a final extension step of 10 min at 72 °C    | 456 bp       |
| <i>mcr1</i>      | F-AGTCCGTTTGTCTTGTGGC<br>R-AGATCCTTGGTCTCGGCTTG         | initial denaturation step of 15 min at 94 °C, followed by 35 cycles as follows:<br>30 sec at 94 °C for denaturation, 90 sec at 58 °C for annealing, 1 min at 72°C<br>for extension and a final extension step of 10 min at 72 °C | 320 bp       |
| <i>mcr2</i>      | F-CAAGTGTGTTGGTCGCAGTT<br>R-TCTAGCCCGACAAGCATACC        | initial denaturation step of 15 min at 94 °C, followed by 35 cycles as follows:<br>30 sec at 94 °C for denaturation, 90 sec at 58 °C for annealing, 1 min at 72°C<br>for extension and a final extension step of 10 min at 72 °C | 715 bp       |
| <i>mcr3</i>      | F-AAATAAAAATTGTTCCGCTTATG<br>R-AATGGAGATCCCCGTTTTT      | initial denaturation step of 15 min at 94 °C, followed by 35 cycles as follows:<br>30 sec at 94 °C for denaturation, 90 sec at 58 °C for annealing, 1 min at 72°C<br>for extension and a final extension step of 10 min at 72 °C | 929 bp       |
| <i>mcr4</i>      | F-TCACTTTCATCACTGCGTTG<br>R-TTGGTCCATGACTACCAATG        | initial denaturation step of 15 min at 94 °C, followed by 35 cycles as follows:<br>30 sec at 94 °C for denaturation, 90 sec at 58 °C for annealing, 1 min at 72°C<br>for extension and a final extension step of 10 min at 72 °C | 1116 bp      |
| <i>mcr5</i>      | F-ATGCGGTTGTCTGCATTTATC<br>R-TCATTGTGGTTGTCTTTTCTG      | initial denaturation step of 15 min at 94 °C, followed by 35 cycles as follows:<br>30 sec at 94 °C for denaturation, 90 sec at 58 °C for annealing, 1 min at 72°C<br>for extension and a final extension step of 10 min at 72 °C | 1644 bp      |
| <i>aphAI-IAB</i> | F-AAACGTCTTGCTCGAGGC<br>R-CAAACCGTTATTCATTCGTGA         | initial denaturation step of 5 min at 95 °C, followed by 30 cycles as follows:<br>1 min at 95 °C for denaturation, 1 min at 55 °C for annealing, 1 min at 72°C<br>for extension and a final extension step of 7 min at 72 °C     | 461 bp       |
| <i>aphA1</i>     | F-ATGGGCTCGCGATAATGTC<br>R-CTCACCGAGGCAGTTCCAT          | initial denaturation step of 7 min at 95 °C, followed by 35 cycles as follows:<br>30 sec at 94 °C for denaturation, 30 sec at 60 °C for annealing, 45 sec at 72°C<br>for extension and a final extension step of 10 min at 72 °C | 634 bp       |

Table S1. Cont.

| Target Gene   | Primer Sequences 5'-3'                           | PCR conditions                                                                                                                                                                                                                   | Product Size |
|---------------|--------------------------------------------------|----------------------------------------------------------------------------------------------------------------------------------------------------------------------------------------------------------------------------------|--------------|
| <i>aphA2</i>  | F-GATTGAACAAGATGGATTGC<br>R-CCATGATGGATACTTTCTCG | initial denaturation step of 7 min at 95 °C, followed by 35 cycles as follows:<br>30 sec at 94 °C for denaturation, 30 sec at 60 °C for annealing, 45 sec at 72°C<br>for extension and a final extension step of 10 min at 72 °C | 347 bp       |
| <i>tetA</i>   | F-GCTACATCCTGCTTGCCTTC<br>R-CATAGATCGCCGTGAAGAGG | initial denaturation step of 5 min at 94 °C, followed by 35 cycles as follows:<br>1 min at 94 °C for denaturation, 1 min at 56 °C for annealing, 1 min at 72°C<br>for extension and a final extension step of 7 min at 72 °C     | 210 bp       |
| <i>tetB</i>   | F-TTGTTAGGGGCAAGTTTTG<br>R-GTAATGGGCCAATAACACCG  | initial denaturation step of 5 min at 94 °C, followed by 35 cycles as follows:<br>1 min at 94 °C for denaturation, 1 min at 53 °C for annealing, 1 min at 72°C<br>for extension and a final extension step of 7 min at 72 °C     | 659 bp       |
| <i>tetC</i>   | F-CTTGAGAGCCTTCAACCCAG<br>R-ATGGTCGTCATCTACCTGCC | initial denaturation step of 5 min at 94 °C, followed by 35 cycles as follows:<br>1 min at 94 °C for denaturation, 1 min at 56 °C for annealing, 1 min at 72°C<br>for extension and a final extension step of 7 min at 72 °C     | 417 bp       |
| <i>sul1</i>   | F-CGGCGTGGGCTACCTGAACG<br>R-GCCGATCGCGTGAAGTTCGG | initial denaturation step of 10 min at 94 °C, followed by 30 cycles as follows:<br>1 min at 94 °C for denaturation, 1 min at 66 °C for annealing, 1 min at 72°C<br>for extension and a final extension step of 10 min at 72 °C   | 433 bp       |
| <i>sul2</i>   | F-CGGCATCGTCAACATAACCT<br>R-TGTGCGGATGAAGTCAGCTC | initial denaturation step of 10 min at 94 °C, followed by 30 cycles as follows:<br>1 min at 94 °C for denaturation, 1 min at 66 °C for annealing, 1 min at 72°C<br>for extension and a final extension step of 10 min at 72 °C   | 721 bp       |
| <i>sul3</i>   | F-GGGAGCCGCTTCCAGTAAT<br>R-TCCGTGACACTGCAATCATTA | initial denaturation step of 5 min at 94 °C, followed by 30 cycles as follows:<br>45 sec at 94 °C for denaturation, 45 sec at 57 °C for annealing, 45 sec at 72°C<br>for extension and a final extension step of 10 min at 72 °C | 500 bp       |
| <i>dfrA1</i>  | F-CAATGGCTGTTGGTTGGAC<br>R-CCGGCTCGATGTCTATTGT   | initial denaturation step of 5 min at 94 °C, followed by 30 cycles as follows:<br>45 sec at 94 °C for denaturation, 45 sec at 62 °C for annealing, 45 sec at 72°C<br>for extension and a final extension step of 10 min at 72 °C | 253 bp       |
| <i>dfrA10</i> | F-TCAAGGCAAATTACCTTGGC<br>R-ATCTATTGGATCACCTACCC | initial denaturation step of 5 min at 94 °C, followed by 30 cycles as follows:<br>45 sec at 94 °C for denaturation, 45 sec at 59 °C for annealing, 45 sec at 72°C<br>for extension and a final extension step of 10 min at 72 °C | 433 bp       |
| <i>dfrA12</i> | F-TTCGCAGACTCACTGAGGG<br>R-CGGTTGAGACAAGCTCGAAT  | initial denaturation step of 5 min at 94 °C, followed by 30 cycles as follows:<br>45 sec at 94 °C for denaturation, 45 sec at 63 °C for annealing, 45 sec at 72°C<br>for extension and a final extension step of 10 min at 72 °C | 330 bp       |

Table S1. Cont.

| Target Gene                | Primer Sequences 5'–3'                            | PCR conditions                                                                                                                                                                                                                   | Product Size |
|----------------------------|---------------------------------------------------|----------------------------------------------------------------------------------------------------------------------------------------------------------------------------------------------------------------------------------|--------------|
| <i>bla<sub>TEM</sub></i>   | F–ATGAGTATTCAACATTTCCG<br>R–CTGACAGTTACCAATGCTTA  | initial denaturation step of 5 min at 95 °C, followed by 35 cycles as follows:<br>1 min at 95 °C for denaturation, 1 min at 55 °C for annealing, 1 min at 72°C<br>for extension and a final extension step of 7 min at 72 °C     | 867 bp       |
| <i>bla<sub>CTX-M</sub></i> | F–CGCTTTGCGATGTGCAG<br>R–ACCGCGATATCGTTGGT        | initial denaturation step of 5 min at 95 °C, followed by 35 cycles as follows:<br>1 min at 95 °C for denaturation, 1 min at 60 °C for annealing, 1 min at 72°C<br>for extension and a final extension step of 10 min at 72 °C    | 585 bp       |
| <i>bla<sub>SHV</sub></i>   | F–AGGATTGACTGCCTTTTTG<br>R–ATTTGCTGATTTGCTCG      | initial denaturation step of 5 min at 94 °C, followed by 30 cycles as follows:<br>1 min at 94 °C for denaturation, 1 min at 55 °C for annealing, 1 min at 72°C<br>for extension and a final extension step of 10 min at 72 °C    | 393 bp       |
| <i>bla<sub>CMY-2</sub></i> | F–GACAGCCTCTTTCTCCACA<br>R–TGGACACGAAGGCTACGTA    | initial denaturation step of 5 min at 94 °C, followed by 30 cycles as follows:<br>1 min at 94 °C for denaturation, 1 min at 55 °C for annealing, 1 min at 72°C<br>for extension and a final extension step of 10 min at 72 °C    | 1000 bp      |
| <i>bla<sub>PSE-1</sub></i> | F–GCAAGTAGGGCAGGCAATCA<br>R–GAGCTAGATAGATGCTCACAA | initial denaturation step of 5 min at 95 °C, followed by 30 cycles as follows:<br>45 sec at 95 °C for denaturation, 45 sec at 60 °C for annealing, 45 sec at 72°C<br>for extension and a final extension step of 10 min at 72 °C | 422 bp       |
